# Supplementary material for: CpG Usage in RNA Viruses: Data and Hypotheses
Source: PubMed Central journal article supplement (PMC3781069; doi:10.1371/journal.pone.0074109), 2013-09-23

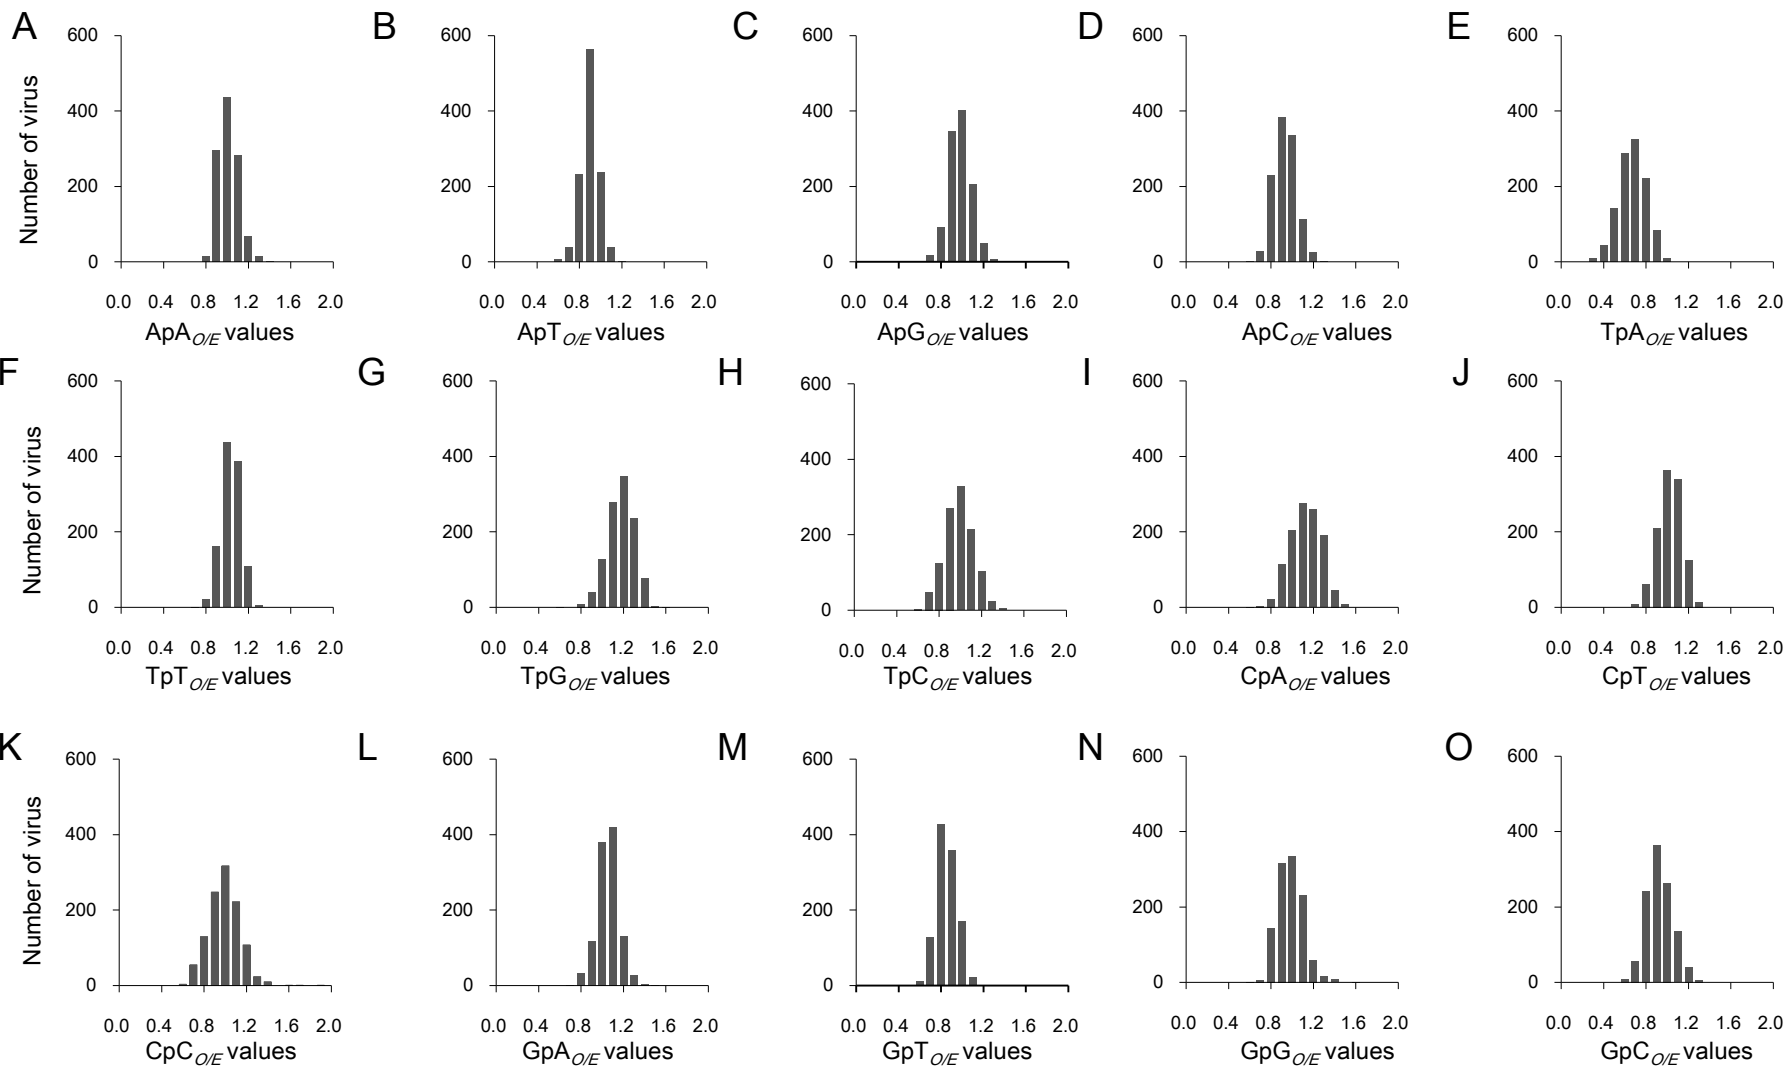

Supplement: pone.0074109.s001.pdf [file pone.0074109.s001.pdf]
